# Supplementary material for: Incorporating benzimidazole units into soluble polyimides for improving properties and application in water content detection in organic solvents
Source: Royal Society of Chemistry journal article supplement (doi:10.1039/d5nj04513d), 2026-01-01
Supplement: d5nj04513d1.pdf [file d5nj04513d1.pdf]

Electronic Supporting Information

# Incorporating benzimidazole units into soluble polyimides for improving properties and application in organic solvents' water content detection

Siming Liang,<sup>a</sup> Hao Ding,<sup>a</sup> Wanting Fang,<sup>b</sup> Lan Wang,<sup>a</sup> Yiwen Dong,<sup>a</sup> Ningbo Yi,<sup>c</sup> Liyong Tian,<sup>a</sup>  
Yangfan Zhang,<sup>a</sup> Feng Gan,<sup>\*a</sup> Yancheng Wu,<sup>\*a</sup> and Zhao-Yang Wang,<sup>\*d</sup>

<sup>a</sup> College of Textile Science and Engineering, Wuyi University, Jiangmen 529020, China.

<sup>b</sup> School of Environmental and Chemical Engineering, Wuyi University, Jiangmen 529020, China.

<sup>c</sup> Guangdong Provincial Key Laboratory of Semiconductor Optoelectronic Materials and Intelligent Photonic Systems, Harbin Institute of Technology, Shenzhen 518055, China.

<sup>d</sup> School of Chemistry, South China Normal University, Guangzhou Key Laboratory of Analytical Chemistry for Biomedicine, GDMPA Key Laboratory for Process Control and Quality Evaluation of Chiral Pharmaceuticals, Key Laboratory of Theoretical Chemistry of Environment, Ministry of Education, Guangzhou 510006, China.

E-mail: [wyc@wyu.edu.cn](mailto:wyc@wyu.edu.cn) (Yancheng Wu), [gf@dhu.edu.cn](mailto:gf@dhu.edu.cn) (Feng Gan), [wangzy@scnu.edu.cn](mailto:wangzy@scnu.edu.cn) (Zhao-Yang Wang).

## Contents

|                                                                                                                              |     |
|------------------------------------------------------------------------------------------------------------------------------|-----|
| 1. Reagents and apparatus.....                                                                                               | S2  |
| 2. Synthesis and characterization of cyano-containing TPM-based diamine monomer ( <b>Scheme S1</b> and <b>Fig. S1</b> )..... | S3  |
| 3. FT-IR spectra of C=O band of the resulting PI films ( <b>Fig. S2</b> ) .....                                              | S4  |
| 4. <sup>1</sup> H NMR spectra of the resulting PIs ( <b>Figs. S3-S6</b> ).....                                               | S5  |
| 5. XRD patterns of the resulting PI films ( <b>Fig. S7</b> ).....                                                            | S7  |
| 6. The solubility behavior of PIs ( <b>Table S1</b> ).....                                                                   | S8  |
| 7. UV-vis absorption spectra ( <b>Figs. S8-S14</b> ).....                                                                    | S9  |
| 8. Changes in organic solutions color of <b>BPADA-CN-NH-F</b> with different water fractions ( <b>Fig. S15</b> ).....        | S13 |

9. Color Changes of **BPADA-CN-NH** film after immersing  $\text{CH}_3\text{CN}$  solution containing  $\text{F}^-$  and TFA alternately (**Fig. S16**) .....S14

## 1. Reagents and apparatus.

**Reagents.** 4,4'-(Hexafluoroisopropylidene) diphthalic anhydride (6FDA, 99%), 4,4'-(4,4'-Isopropylidenediphenoxy) diphthalic anhydride (BPADA, 99%), bis-(3-phthalyl anhydride) ether (ODPA, 99%) and 5-amino-2-(4-aminophenyl) benzimidazole (BIDA, 99%) were purchased from Chinatech Chemical Co., Ltd. (Tianjin, China). *N*-methyl pyrrolidone (NMP), 2,6-dimethylaniline (99%) were provided by Macklin Company (Shanghai, China). Dimethylformamide [DMF, 99.8%, extra dry, with molecular sieves, Water  $\leq$  50 ppm (by K.F.), EnergySeal], tetrahydrofuran [THF, 99.5%, extra dry, with molecular sieves, Water  $\leq$  50 ppm (by K.F.), EnergySeal], dimethyl sulfoxide [DMSO, 99.7%, extra dry, with molecular sieves, Water  $\leq$  50 ppm (by K.F.), EnergySeal], 2-methoxyethanol, isoquinoline, 4-cyanobenzaldehyde and trifluoroacetic acid (TFA) were purchased from Anhui Senrise Technology Co., Ltd. (Anhui, China) and used as received. Other reagents, including TBA salts, and common solvents were purchased from various merchants and used as received.

**Apparatus.** The intrinsic viscosities ( $\eta_{inh}$ ) of the PI solutions were measured with an Ubbelohde viscometer at 25 °C with a concentration of 0.5 g/g/dL in DMAc. Fourier transform infrared (FT-IR) spectra were recorded on a Nicolet IS50 FTIR spectrometer over the wavenumber range of 500 to 4000  $\text{cm}^{-1}$ .  $^1\text{H}$  NMR spectra of PI fibers dissolved in  $\text{DMSO-}d_6$  were obtained on a DRX-500 or DRX-600 MHz NMR spectrometer (Bruker, Germany). Thermogravimetric analysis (TA Discovery TGA 550, USA) was conducted with a heating rate of 20 °C $\cdot$ min $^{-1}$  from 30 to 800 °C under nitrogen atmosphere. The dynamic differential scanning calorimeter (DSC, NETZSCH DSC 214Polyma, Germany) was performed to assess glass transition temperature ( $T_g$ ) at a heating rate of 40 °C $\cdot$ min $^{-1}$  under nitrogen. X-ray diffraction (XRD) data were obtained on an Ultima IV X-ray diffractometer (Rigaku, Japan). The mechanical properties of PI films were measured by an Instron Legend 2366 (Instron, America) testing system. UV-*vis* absorption spectra were tested on a 2700 UV-*vis* spectrophotometer (Shimadzu, Japan) at room temperature.

## 2. Synthesis and characterization of cyano-containing TPM-based diamine monomer.

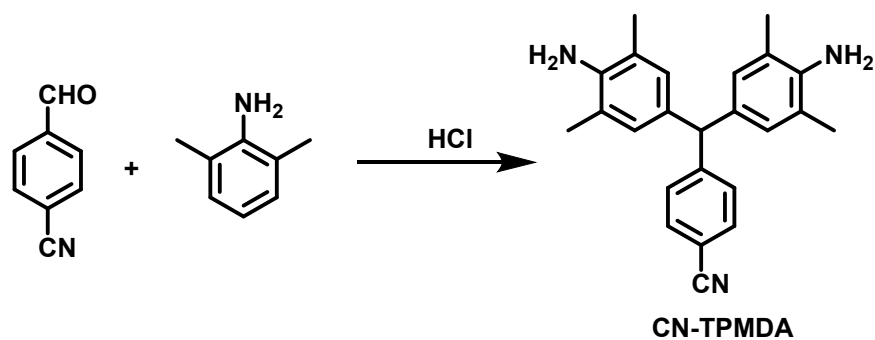

**Scheme S1.** Synthesis process of the diamine monomer **CN-TPMDA**

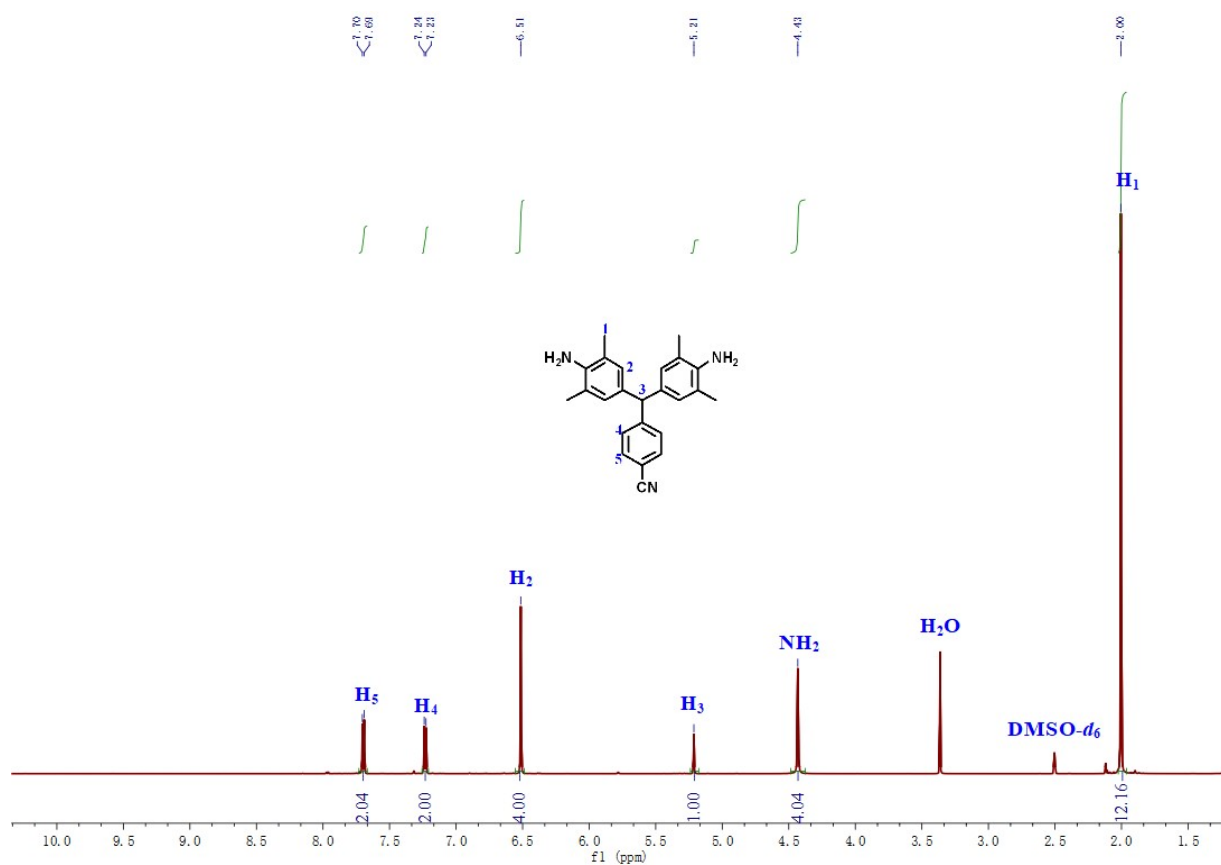

### 3. FT-IR spectra of C=O band of the resulting PI films.

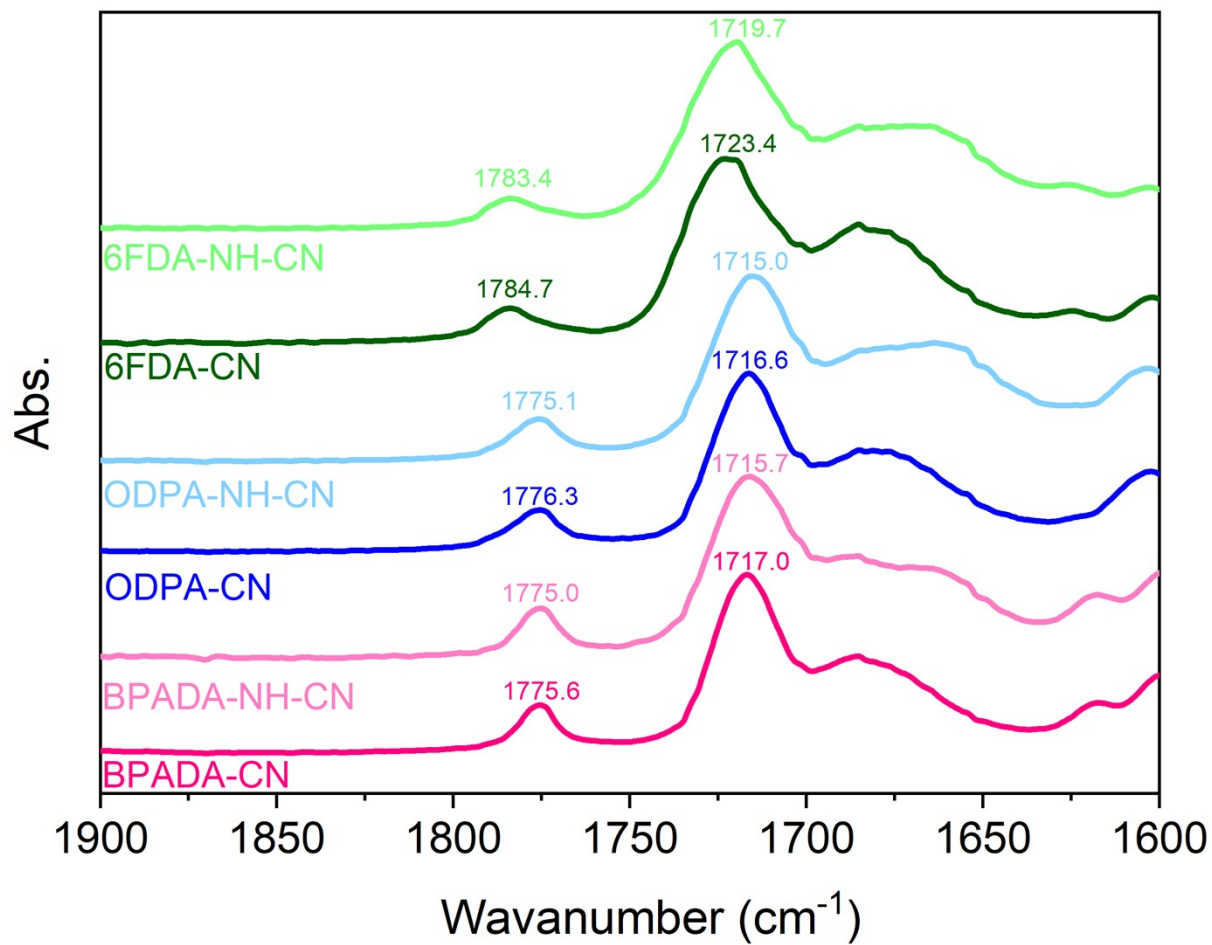

**Fig. S2** FT-IR spectra of C=O band for the resulting PI films.

#### 4. $^1\text{H}$ NMR spectra of the resulting PIs.

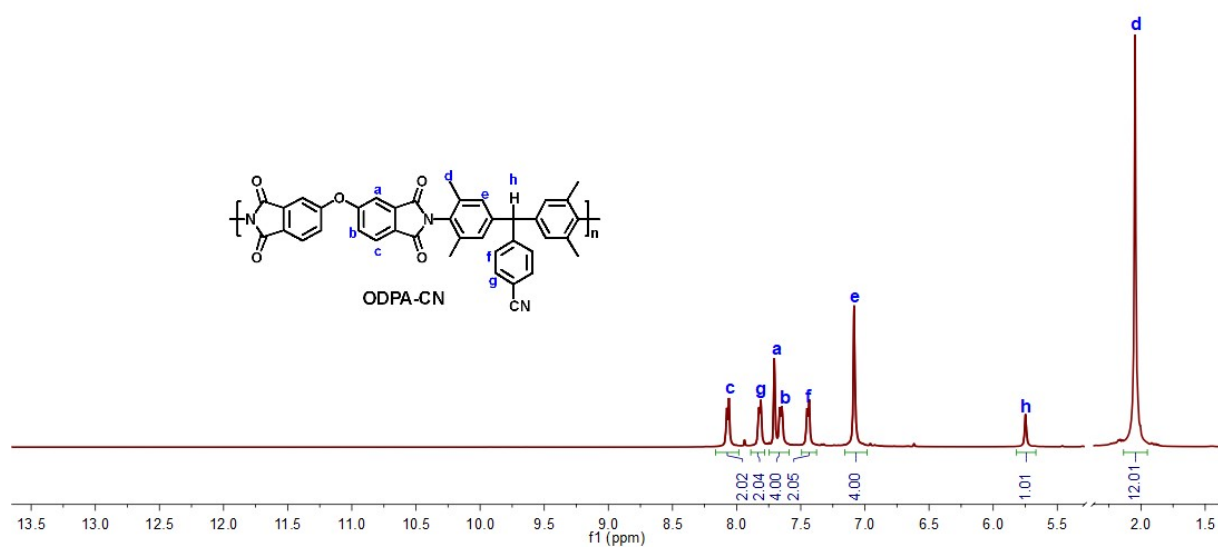

Fig. S3  $^1\text{H}$  NMR spectrum of ODPA-CN.

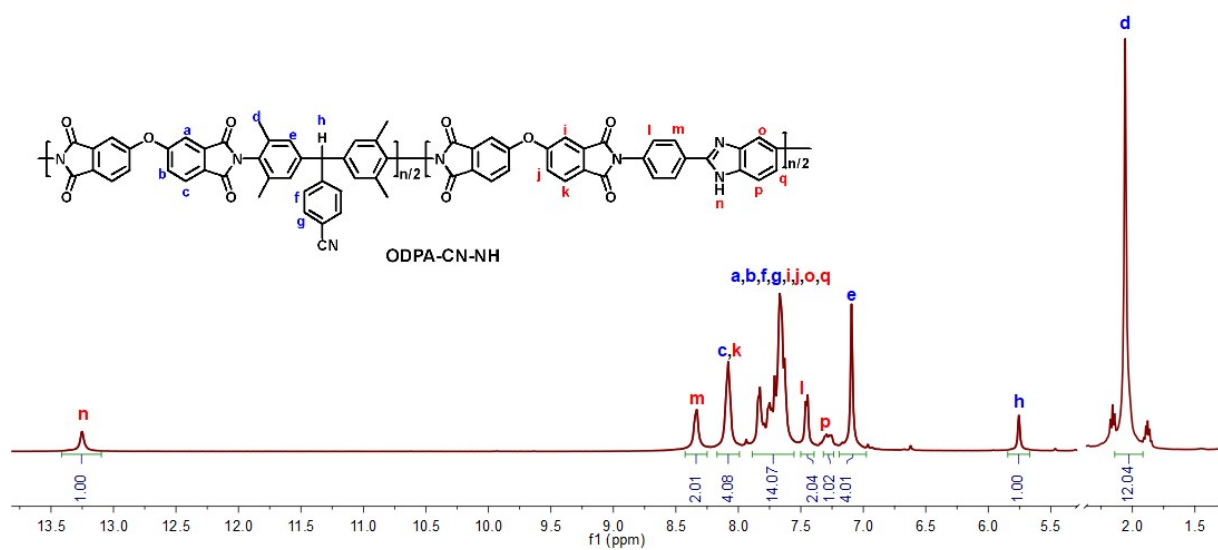

Fig. S4  $^1\text{H}$  NMR spectrum of ODPA-CN-NH.

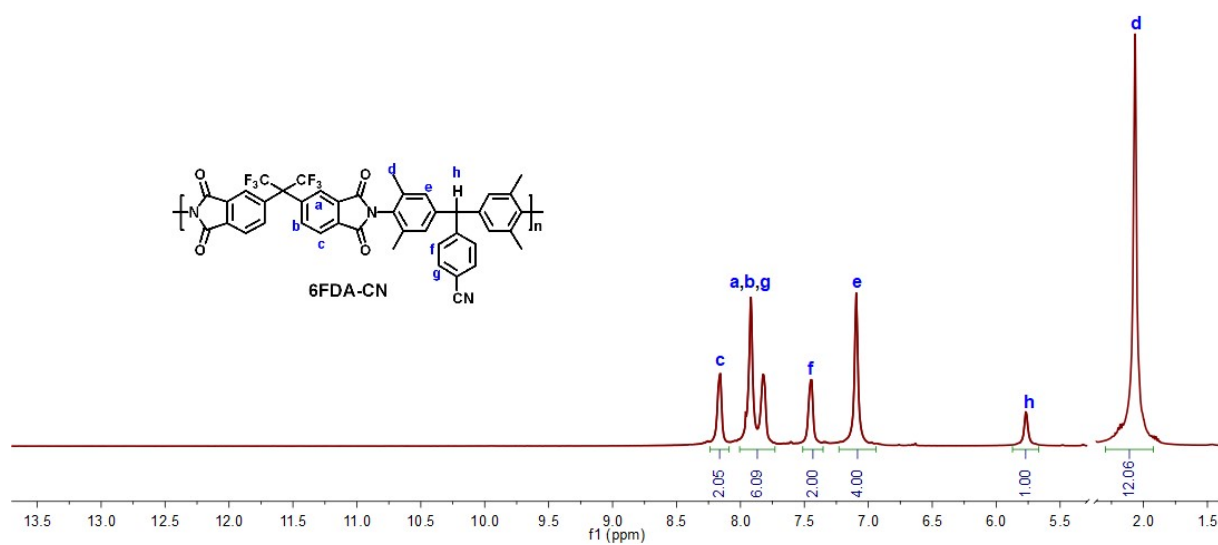

**Fig. S5** <sup>1</sup>H NMR spectrum of 6FDA-CN.

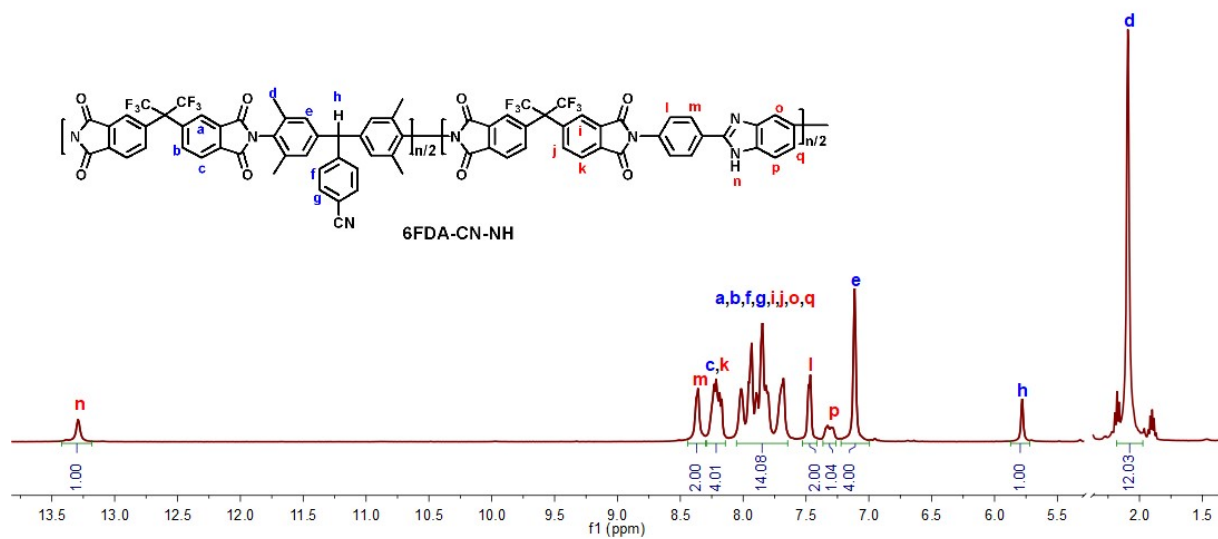

**Fig. S6** <sup>1</sup>H NMR spectrum of 6FDA-CN-NH.

## 5. XRD patterns of the resulting PI films.

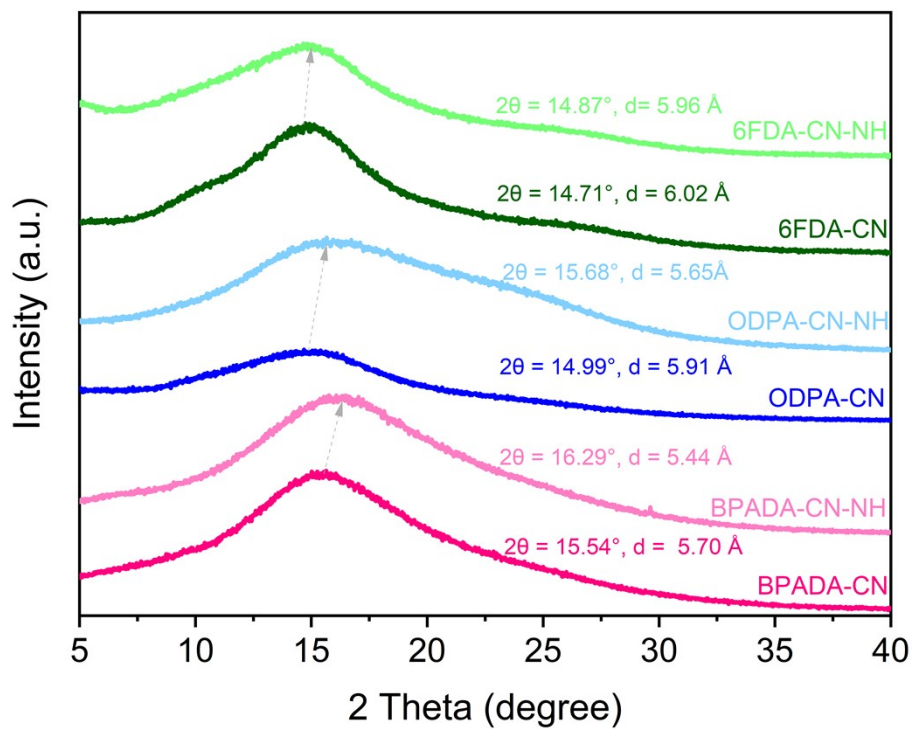

**Fig. S7** XRD patterns of the resulting PI films.



## 6. The solubility behavior of PIs

**Table S1** The solubility behavior of PIs

| <b>PIs</b>         | <b>DMSO</b> | <b>DMF</b> | <b>DMAc</b> | <b>NMP</b> | <b>THF</b> | <b>Acetone</b> | <b>CHCl<sub>3</sub></b> | <b>CH<sub>2</sub>Cl<sub>2</sub></b> |
|--------------------|-------------|------------|-------------|------------|------------|----------------|-------------------------|-------------------------------------|
| <b>BPAPA-CN</b>    | ++          | ++         | ++          | ++         | ++         | ±              | ++                      | ++                                  |
| <b>BPADA-CN-NH</b> | ++          | ++         | ++          | ++         | ++         | ±              | ±                       | ±                                   |
| <b>ODPA-CN</b>     | ++          | ++         | ++          | ++         | ++         | ±              | ++                      | ++                                  |
| <b>ODPA-CN-NH</b>  | ++          | ++         | ++          | ++         | ±          | ±              | ±                       | ±                                   |
| <b>6FDA-CN</b>     | ++          | ++         | ++          | ++         | ++         | ++             | ++                      | ++                                  |
| <b>6FDA-CN-NH</b>  | ++          | ++         | ++          | ++         | ++         | ±              | ±                       | ±                                   |

Qualitative solubility of 10 mg of PI films in 1 mL of solvent. ++, soluble at room temperature; +, soluble on heating; ±, partially soluble or swelling; --, insoluble even on heating.

## 7. UV-vis absorption spectra.

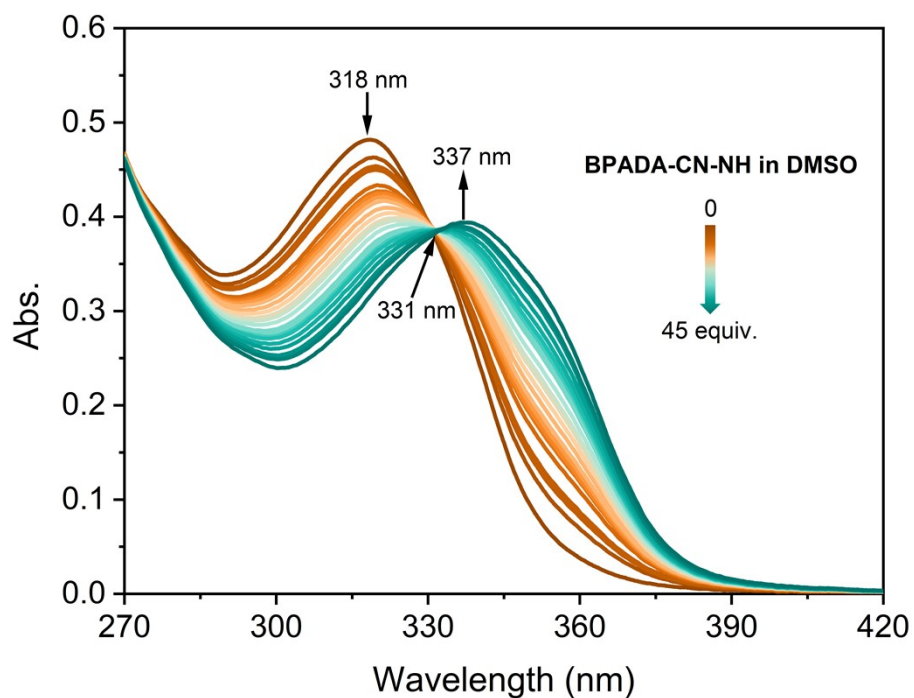

**Fig. S8** UV-vis absorption spectra of **BPADA-CN-NH** ( $10\ \mu\text{M}$ ) in anhydrous DMSO during titration with  $\text{F}^-$  (0-45 equiv.).

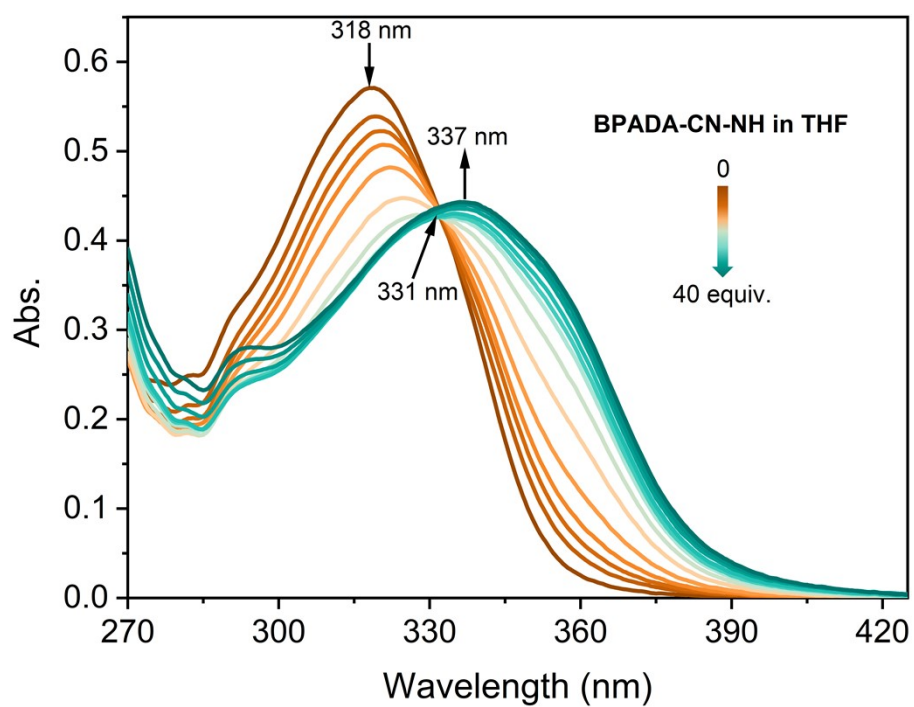

**Fig. S9** UV-vis absorption spectra of **BPADA-CN-NH** ( $10\ \mu\text{M}$ ) in anhydrous THF during titration with  $\text{F}^-$  (0-40 equiv.).

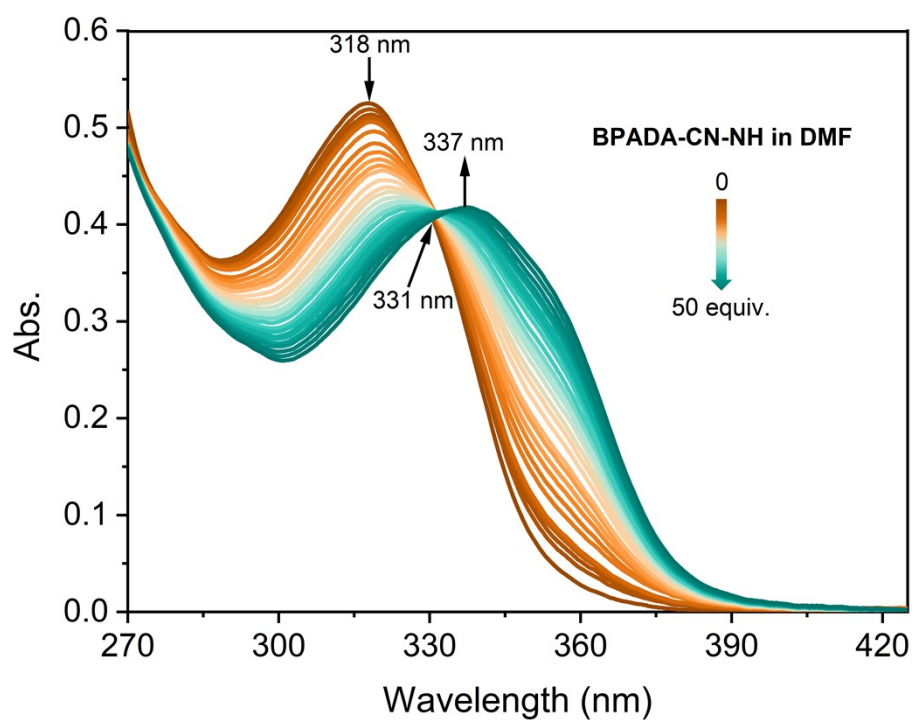

**Fig. S10** UV-vis absorption spectra of **BPADA-CN-NH** (10 μM) in anhydrous DMF during titration with F<sup>-</sup> (0-50 equiv.).

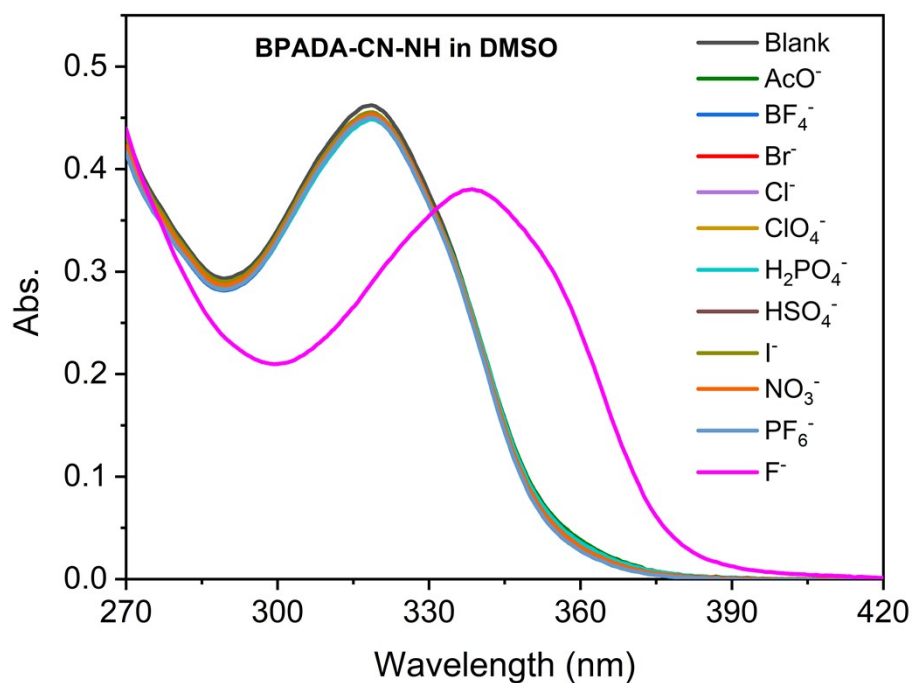

**Fig. S11** UV-vis absorption spectra of **BPADA-CN-NH** (10 μM) in anhydrous DMSO with various anions (45 equiv.).

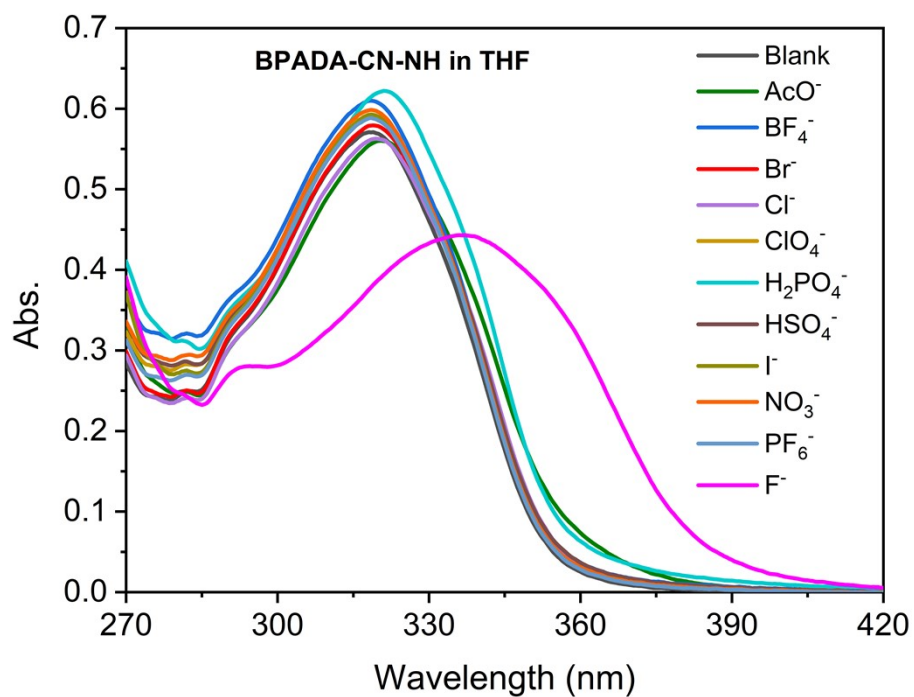

**Fig. S12** UV-vis absorption spectra of **BPADA-CN-NH** (10  $\mu$ M) in anhydrous THF with various anions (40 equiv.).

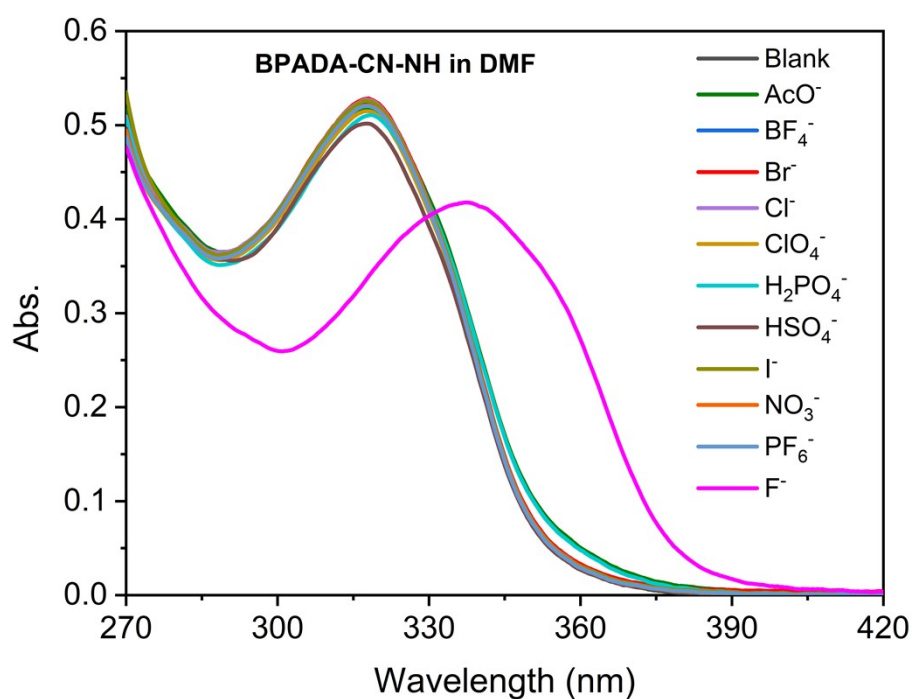

**Fig. S13** UV-vis absorption spectra of **BPADA-CN-NH** (10  $\mu$ M) in anhydrous DMF with various anions (50 equiv.).

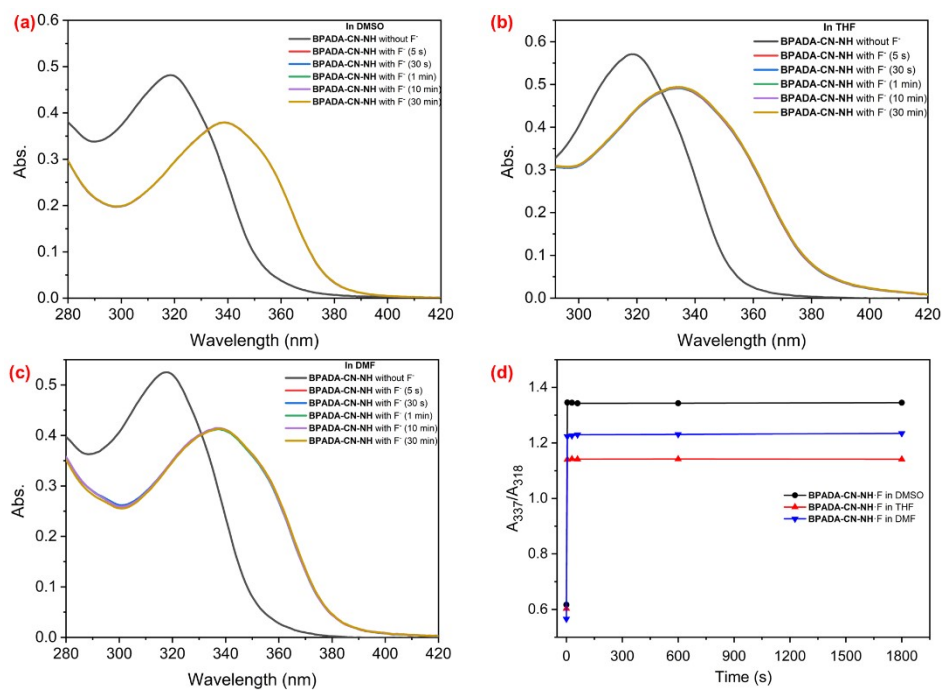

**Fig. S14** UV-vis absorption spectra change of BPADA-CN-NH in DMSO (a), THF (b), and DMF (c)

without and with F<sup>-</sup> after different time; Time-dependent UV-vis absorption ratio of the deprotonated

**BPADA-CN-NH** in DMSO, THF, and DMF (d).

**8. Changes in organic solutions color of BPADA-CN-NH·F with different water fractions.**

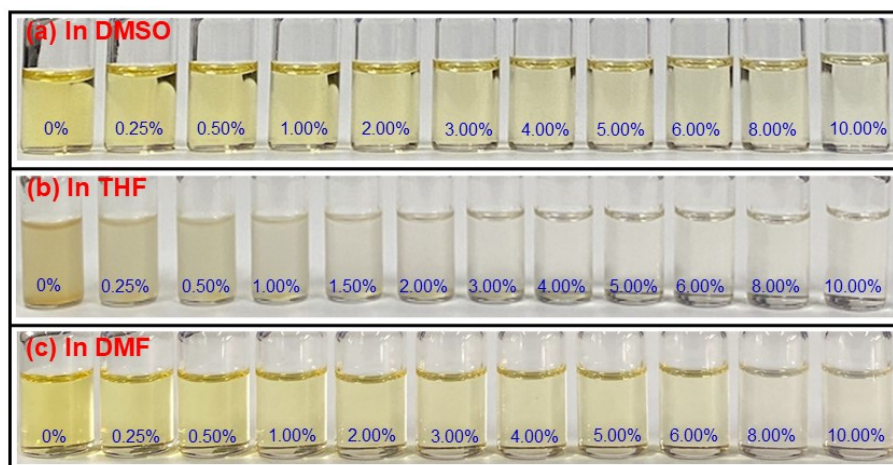

**Fig. S15** Changes in color of **BPADA-CN-NH·F** (1 mM **BPADA-CN-NH** + 6 equiv.  $F^-$ ) with different water fractions (0-10.00%, v/v) in (a) DMSO, (b) THF, and (c) DMF solutions.

**9. Color Changes of BPADA-CN-NH film after immersing CH<sub>3</sub>CN solution containing F<sup>-</sup> and TFA alternately.**

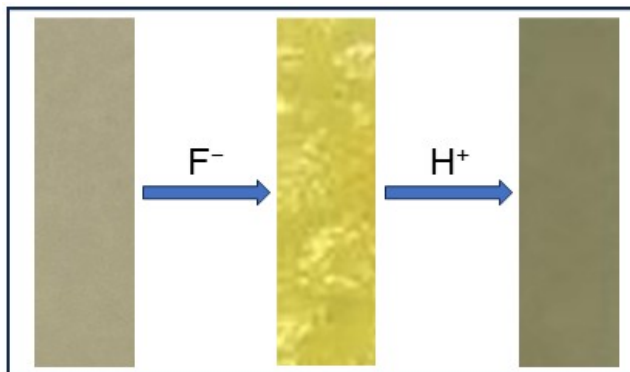

**Fig. S16** The color change of **BPADA-CN-NH** film after immersing CH<sub>3</sub>CN solution containing F<sup>-</sup> and TFA alternately.
